# Supplementary material for: Association of smoking cessation after new-onset type 2 diabetes with overall and cause-specific mortality among Korean men: a nationwide population-based cohort study
Source: PubMed Central journal article supplement — BMJ Open Diabetes Res Care. 2020 Jul 5;8(1):e001249. doi: 10.1136/bmjdrc-2020-001249 (PMC7337624; doi:10.1136/bmjdrc-2020-001249), 2020-07-05
Supplement: bmjdrc-2020-001249supp001.pdf [file bmjdrc-2020-001249supp001.pdf]

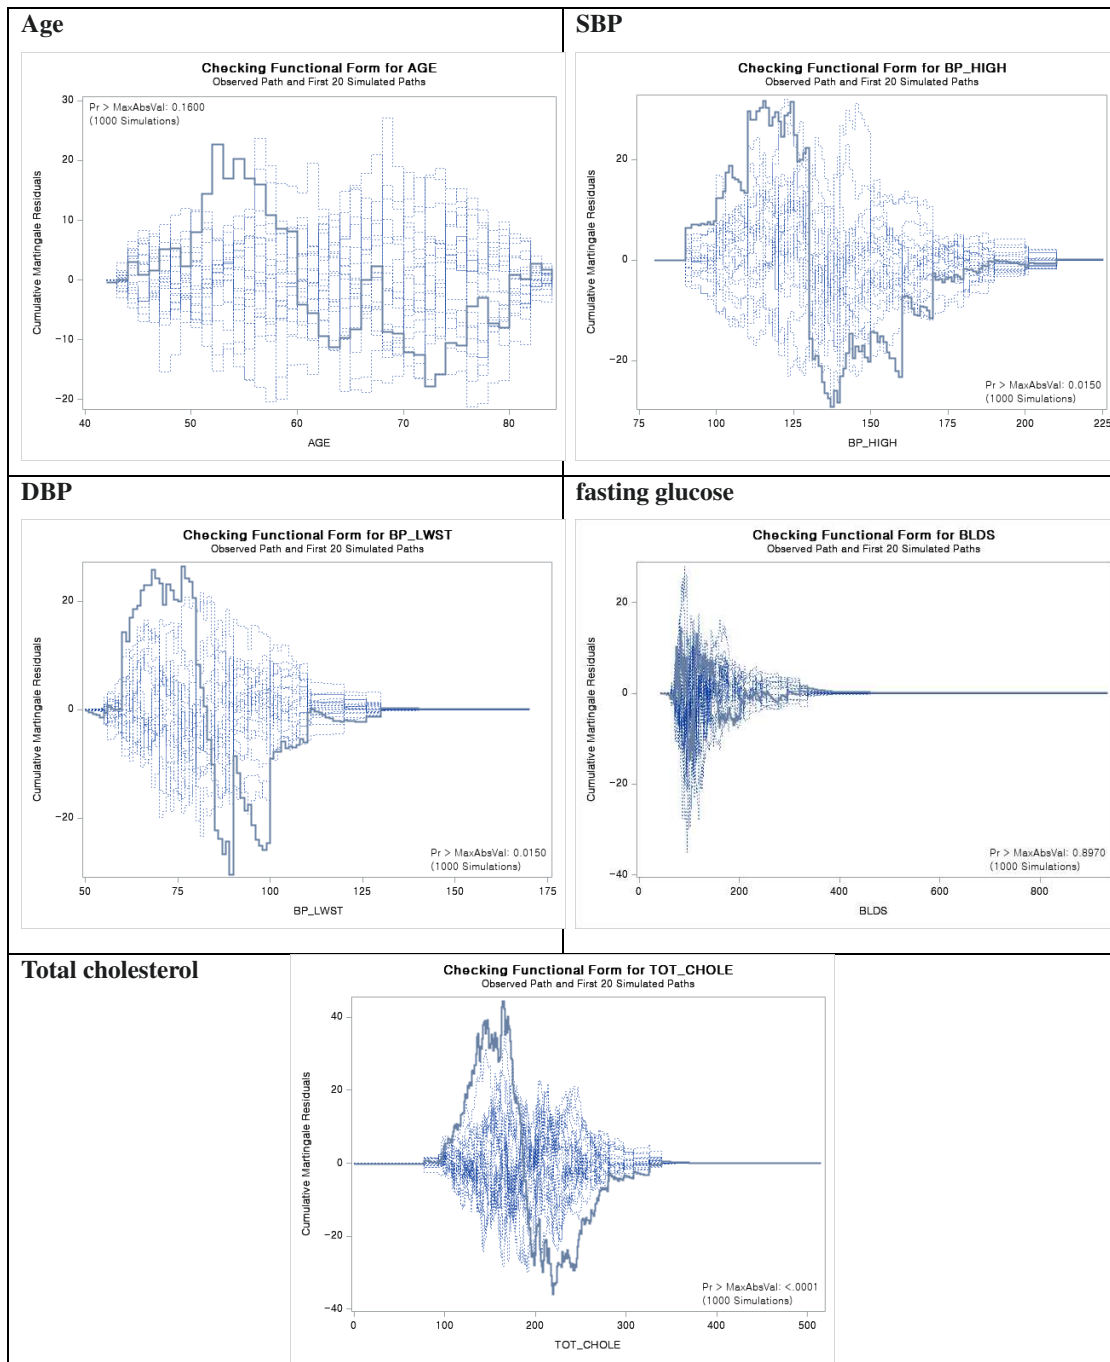

Supplementary figure 1. The Results for supremum test to explore functional forms of the continuous variables

Supplementary table 1. Lists of principal component codes for oral antidiabetic medication and insulin used in our study

| Item                                    | Principal component codes               |
|-----------------------------------------|-----------------------------------------|
| Oral antidiabetic medication            | 191501ATB 191502AGR 191502ATB 191502ATR |
|                                         | 191503ATB 191504ATB 191504ATR 191505ATR |
|                                         | 165401ATB 165402ATB 165501ATB 132001ATB |
|                                         | 417401ATB 417402ATB 417401ATB 417402ATB |
|                                         | 165801ATB A0096901 165901ATB 165601ACS  |
|                                         | 165602ACS 165602ATB 165603ATR 165604ATR |
|                                         | 165701ATB 165702ATB 165703ATB 165704ATB |
|                                         | 348001ATB 348002ATB 348003ATB 431901ATB |
|                                         | 431902ATB 501101ATB 501102ATB 501103ATB |
|                                         | 417403ATB 613301ATB 613302ATB 624202ATB |
|                                         | 624203ATB 624201ATB 616401ATB 619101ATB |
|                                         | 523800ATR 421100ATB 443400ATB 443500ATB |
|                                         | 471900ATB 497200ATB 474200ATB 474300ATB |
|                                         | 474300ATR 498600ATB 452700ATB 452900ATB |
|                                         | 461200ATB 469100ATB 471800ATB 488800ATB |
|                                         | 488900ATB 489000ATB 498100ATB 524700ATR |
|                                         | 502300ATB 502300ATR 502900ATB 513700ATB |
|                                         | 513700ATR 507000ATB 507100ATB 519600ATB |
|                                         | 518600ATR 518500ATR 520500ATB 520700ATB |
|                                         | 520600ATB 100601ATB 100602ATB 406201ATB |
|                                         | 406202ATB 417404ATB 417405ATB 379501ATB |
|                                         | 379502ATB 379503ATB 430201ATB 430202ATB |
|                                         | 430203ATB 486101ATB                     |
|                                         | Insulin                                 |
| 170402BIJ 170502BIJ 175301BIJ 175302BIJ |                                         |
| 175304BIJ 441301BIJ 441302BIJ 441303BIJ |                                         |
| 441304BIJ 441305BIJ 461801BIJ 461802BIJ |                                         |
| 484901BIJ 484902BIJ 488701BIJ 507401BIJ |                                         |
|                                         |                                         |

Supplementary table 2. Risk of overall and cause-specific mortality according to change of smoking status

| Category            | Variables           | No of study subjects | Person-years | Death event | Age-standardized mortality rates | HR <sup>a</sup> | 95% CI |      | p-value |
|---------------------|---------------------|----------------------|--------------|-------------|----------------------------------|-----------------|--------|------|---------|
| All-cause mortality | Current smokers     | 4,609                | 33,175       | 369         | 9.2                              | 1.00            |        |      |         |
|                     | Short-term quitters | 2,199                | 15,842       | 172         | 7.2                              | 0.78            | 0.64   | 0.95 | 0.015   |
|                     | Long-term quitters  | 1,896                | 13,748       | 125         | 6.3                              | 0.68            | 0.54   | 0.85 | 0.001   |
|                     | Never smokers       | 4,673                | 33,523       | 348         | 6.4                              | 0.66            | 0.56   | 0.78 | <.001   |
|                     |                     |                      |              |             |                                  |                 |        |      |         |
| Death from cancer   | Current smokers     | 4,609                | 33,175       | 166         | 4.1                              | 1.00            |        |      |         |
|                     | Short-term quitters | 2,199                | 15,842       | 63          | 2.6                              | 0.60            | 0.44   | 0.83 | 0.002   |
|                     | Long-term quitters  | 1,896                | 13,748       | 54          | 2.6                              | 0.65            | 0.46   | 0.90 | 0.010   |
|                     | Never smokers       | 4,673                | 33,523       | 123         | 2.1                              | 0.50            | 0.39   | 0.65 | <.001   |
|                     |                     |                      |              |             |                                  |                 |        |      |         |
| Death from CVD      | Current smokers     | 4,609                | 33,175       | 61          | 1.5                              | 1.00            |        |      |         |
|                     | Short-term quitters | 2,199                | 15,842       | 30          | 1.3                              | 0.74            | 0.46   | 1.18 | 0.210   |
|                     | Long-term quitters  | 1,896                | 13,748       | 24          | 1.3                              | 0.64            | 0.39   | 1.07 | 0.087   |
|                     | Never smokers       | 4,673                | 33,523       | 69          | 1.3                              | 0.72            | 0.49   | 1.06 | 0.092   |
|                     |                     |                      |              |             |                                  |                 |        |      |         |

Note. CVD, cardiovascular disease; HR, hazard ratio; CI, confident interval

<sup>a</sup>HRs were estimated after adjusting for age, BMI, BP, fasting glucose, total cholesterol, family history of diabetes, heavy drinking, exercise, household income, residential area, and comorbidities

Supplementary table 3. Change of smoking status and risk of mortality according to BMI and exercise

| Category              | Variables    | Current smokers | HR (95% CI)         |                     |                     | p for trend |
|-----------------------|--------------|-----------------|---------------------|---------------------|---------------------|-------------|
|                       |              |                 | Short-term quitters | Long-term quitters  | Never smokers       |             |
| BMI <sup>a</sup>      | BMI<25       | 1.00            | 0.73 (0.58-0.92)**  | 0.67 (0.52-0.87)**  | 0.64 (0.53-0.78)*** | <.001       |
|                       | BMI≥25       | 1.00            | 0.74 (0.51-1.07)    | 0.61 (0.40-0.93)*   | 0.61 (0.44-0.84)**  | 0.001       |
| Exercise <sup>b</sup> | Exercise     | 1.00            | 0.54 (0.38-0.76)*** | 0.58 (0.42-0.80)*** | 0.58 (0.45-0.75)*** | <.001       |
|                       | Non-exercise | 1.00            | 0.96 (0.74-1.23)    | 0.76 (0.56-1.02)    | 0.72 (0.58-0.90)**  | 0.003       |

Note. BMI, body mass index; HR, hazard ratio; CI, confident interval

<sup>a</sup>HRs were estimated after adjusting for age, BP, fasting glucose, total cholesterol, family history of diabetes, heavy drinking, exercise, household income, residential area, and comorbidities

<sup>b</sup>HRs were estimated after adjusting for age, BMI, BP, fasting glucose, total cholesterol, family history of diabetes, heavy drinking, household income, residential area, and comorbidities

\* p-value<0.05, \*\* p-value<0.01, \*\*\*p-value<0.001
